# Supplementary material for: Leptomeningeal fibroblasts promote glioblastoma progression by regulating cerebrospinal fluid dynamics
Source: Research Square preprint supplement (doi:10.21203/rs.3.rs-7606674/v1), 2025-11-06
Supplement: Supplementary file 1 [file 635075582bf8a14f1d268f62.pdf]

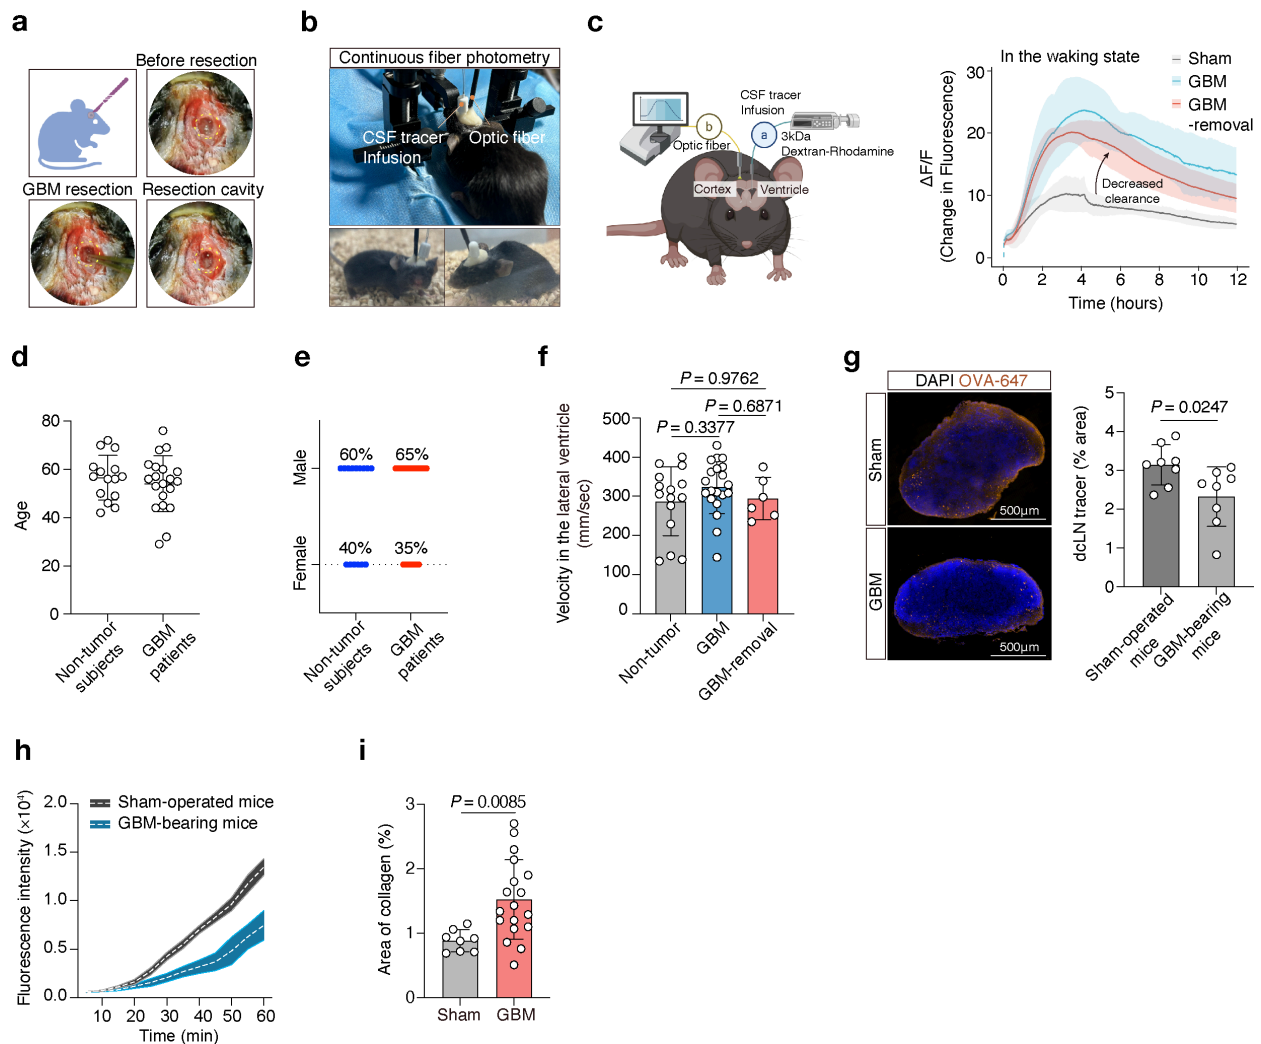

**Extended Data Fig. 1 | Dynamics of cerebrospinal fluid in GBM-bearing mice.**

**a**, Schematic of tumor resection in the orthotopic GBM tumor-bearing mouse model under microscopy.

**b**, Schematic of lateral ventricle catheter implantation and tracer (FITC-dextran, 3 kDa) injection methodology, with tracer administration and monitoring performed in awake mice.

**c**, Dynamic fluorescence signal changes of CSF tracers in the cortical region for Sham, GBM, and GBM-removal groups (n = 3 mice per group). Figure created with BioRender.com.

**d–e**, Age and sex distribution of non-tumor controls (reference) and GBM patients included in phase-contrast MRI (PC-MRI) analysis.

**f**, Bar graphs showing lateral ventricle flow velocity changes in non-tumor control individuals (mean  $\pm$  s.d., n = 15), GBM patients (mean  $\pm$  s.d., n = 20), and postoperative GBM patients (mean  $\pm$  s.d., n = 6).

**g**, Left: Representative fluorescence images of deep cervical lymph nodes in Sham and GBM tumor-bearing mouse models after CSF injection with the tracer Ovalbumin-AF647. Scale bar, 500  $\mu$ m. Right: Bar graphs showing the fluorescent coverage area of deep cervical lymph nodes (mean  $\pm$  s.d., n = 8 mice per group).

**h**, Fluorescence signal changes in venous blood samples within 60 minutes after CSF injection of the tracer (Ovalbumin-AF647) in Sham and GBM tumor-bearing mouse models (n = 3 mice per group).

**i**, Bar graphs showing the area of leptomeningeal I/III collagen fibers (COL1A1<sup>+</sup>/COL3A1<sup>+</sup>) in Sham (mean  $\pm$  s.d., n = 8 mice) and GBM tumor-bearing mouse models (mean  $\pm$  s.d., n = 18 mice).

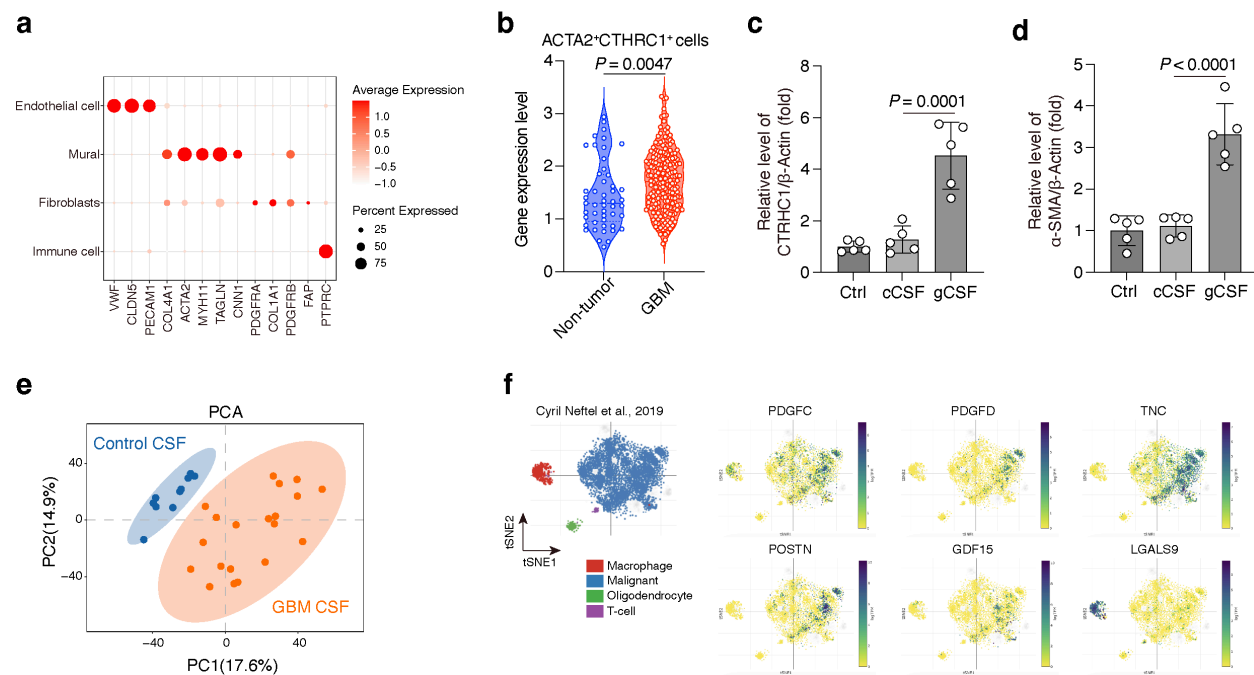

**Extended Data Fig. 2 | CTHRC1<sup>+</sup>α-SMA<sup>+</sup> leptomeningeal fibroblasts and GBM-CSF derived secretory proteins.**

**a**, Annotation information for cell clusters in single-cell data from leptomeningeal tissues of non-tumor controls (n = 3) and GBM patients (n = 3).

**b**, Features of CTHRC1<sup>+</sup>α-SMA<sup>+</sup> pathological fibroblasts in leptomeningeal fibroblasts of non-tumor control individuals and GBM patients. The y-axis represents the mean gene expression of the target cell cluster (mean  $\pm$  s.d.). Each point in the violin plot represents a single CTHRC1<sup>+</sup>α-SMA<sup>+</sup> pathological fibroblast.

**c–d**, Protein level changes of CTHRC and α-SMA in HEBF cells treated with cerebrospinal fluid from non-tumor control individuals (cCSF) or GBM patients (gCSF) (mean  $\pm$  s.d., n = 5 per group).

**e**, Principal component analysis (PCA) of proteomics data from CSF samples of GBM patients (n = 20) and non-tumor control patients (n = 10).

**f**, t-SNE plot showing the expression of genes corresponding to differentially upregulated secretory proteins in CSF samples of GBM patients vs. non-tumor controls in GBM tumor tissues.

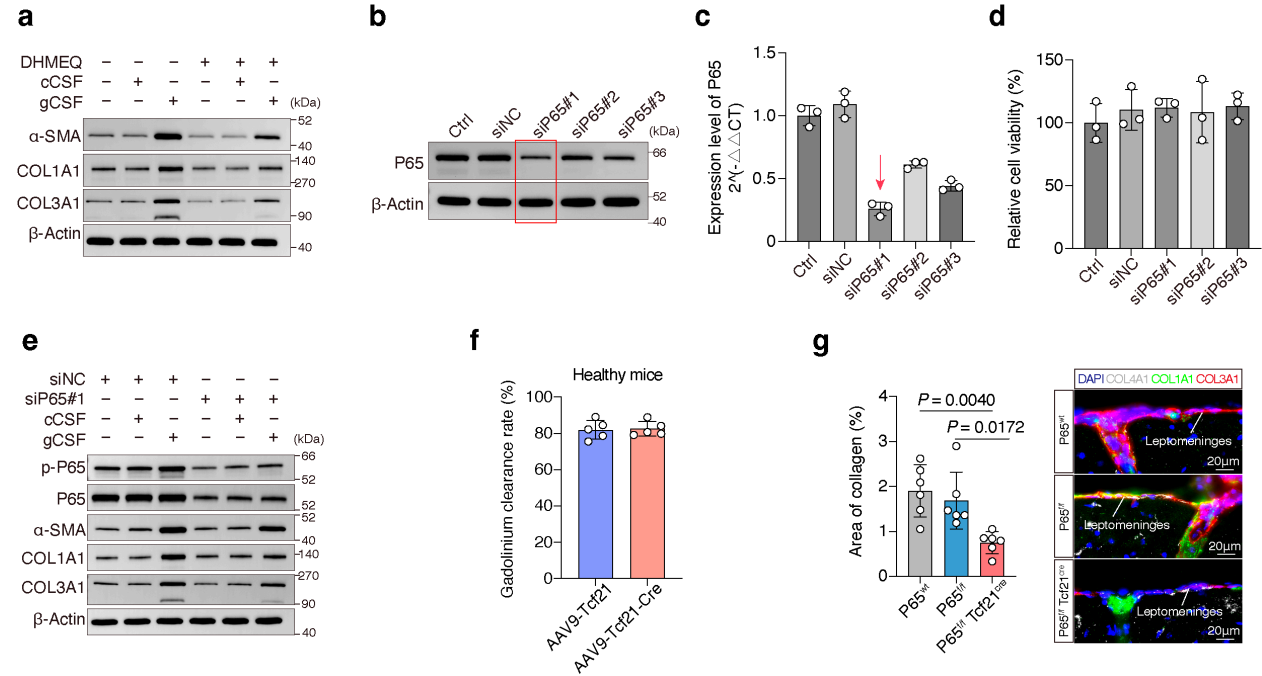

### Extended Data Fig. 3 | NF-κB/P65 signaling in leptomeningeal fibroblasts regulates CSF clearance and collagen deposition.

**a**, Protein expression levels of α-SMA, COL1A1, and COL3A1 in hPLMFs treated with cCSF or gCSF following DHMEQ (a selective P65 inhibitor) intervention.

**b-c**, Protein expression and RNA levels of P65 in hPLMFs after siRNA transfection (mean ± s.d., n = 3 per group).

**d**, Cell viability of hPLMFs after siP65 transfection (mean ± s.d., n = 3 per group).

**e**, Protein expression levels of phosphorylated P65, total P65, α-SMA, COL1A1, and COL3A1 in hPLMFs treated with cCSF or gCSF after P65 gene silencing via siRNA.

**f**, Bar graphs showing the impact of P65 knockout in leptomeningeal fibroblasts on gadobutrol clearance rate in healthy mouse CSF (mean ± s.d., n = 5 per group).

**g**, Left: Bar graphs showing the area of I/III collagen fibers in the leptomeninges of GBM tumor-bearing mice in the P65<sup>wt</sup>, P65<sup>fl/fl</sup>, and P65<sup>fl/fl</sup>Tcf21<sup>Cre</sup> groups (mean ± s.d., n = 6 per group). Right:

Representative images of I/III collagen fibers in the leptomeninges of these groups. Scale bar, 20  $\mu$ m.

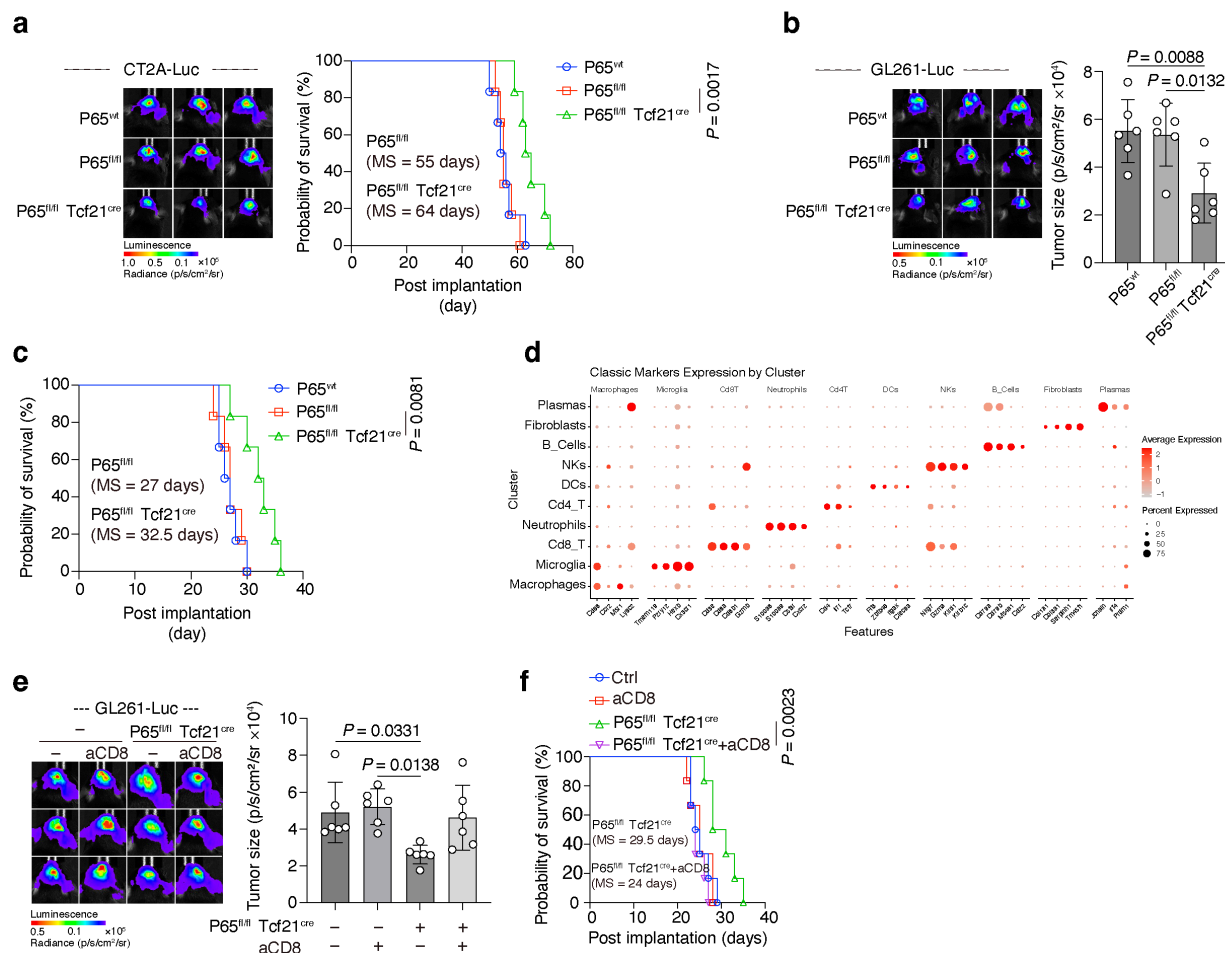

## Extended Data Fig. 4 | NF-κB/P53 signaling in leptomeningeal fibroblasts regulates GBM progression via CSF clearance and CD8<sup>+</sup> T cell immunity.

**a**, Left: Representative bioluminescence imaging images of CT2A-Luc tumor-bearing mice in the P65<sup>wt</sup>, P65<sup>f/f</sup>, and P65<sup>f/f</sup>Tcf<sup>Cre</sup> groups. Right: Survival curves of CT2A-Luc tumor-bearing mice in each group (n = 6 per group, Log-rank test).

**b**, Left: Representative bioluminescence imaging images of GL261-Luc tumor-bearing mice in the P65<sup>wt</sup>, P65<sup>f/f</sup>, and P65<sup>f/f</sup>Tcf<sup>Cre</sup> groups. Right: Bar graphs showing tumor burden size in each group (mean ± s.d., n = 6 per group).

**c**, Survival curves of GL261-Luc tumor-bearing mice in the P65<sup>wt</sup>, P65<sup>f/f</sup>, and P65<sup>f/f</sup>Tcf<sup>Cre</sup> groups (n = 6 per group, Log-rank test).

**d**, Single-cell RNA sequencing data of CD45<sup>+</sup> cells in tumor tissues of CT2A-Luc tumor-bearing mice in the P65<sup>f/f</sup>, and P65<sup>f/f</sup>Tcf<sup>Cre</sup> groups, showing the division and annotation of 10 immune cell subpopulations and biomarkers.

**e**, Left: Representative bioluminescence imaging images of GL261-Luc tumor-bearing mice in the P65<sup>f/f</sup>, and P65<sup>f/f</sup>Tcf<sup>Cre</sup> groups treated with IgG isotype or anti-CD8 $\alpha$  neutralizing antibodies. Right: Bar graphs showing tumor burden size in GL261-Luc tumor-bearing mice (mean  $\pm$  s.d., n = 6 per group).

**f**, Survival curves showing the therapeutic effects of IgG isotype and anti-CD8 $\alpha$  neutralizing antibodies in P65<sup>f/f</sup>, and P65<sup>f/f</sup>Tcf<sup>Cre</sup> mice (GL261-Luc model) (n = 6 per group, Log-rank test).

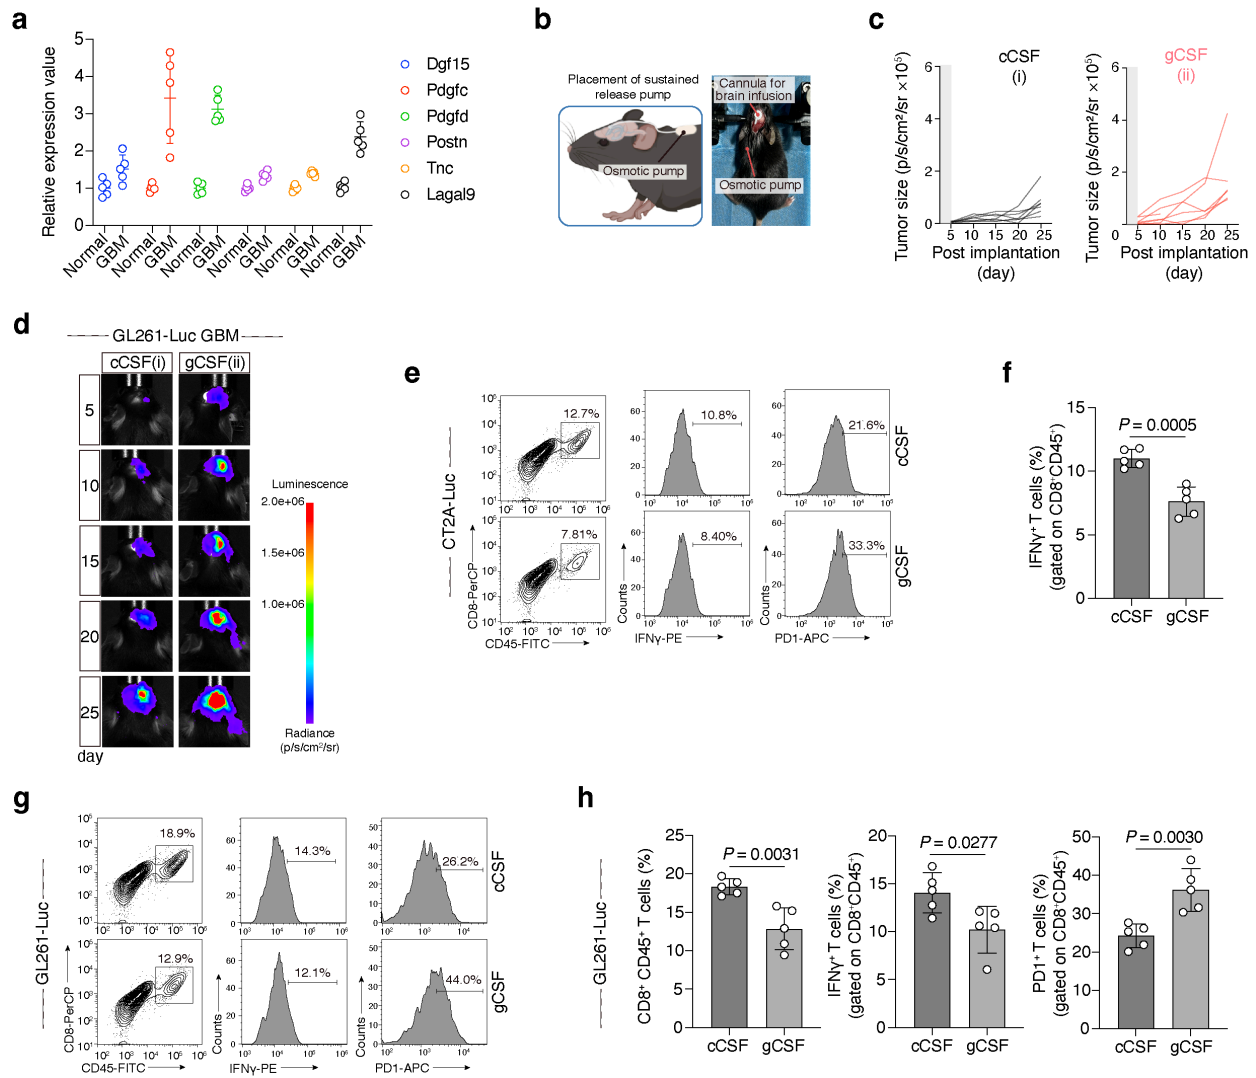

**Extended Data Fig. 5 | Impaired CSF clearance drives GBM progression via CD8<sup>+</sup> T cell exhaustion.**

**a**, Expression levels of representative secretory proteins (Dgf15, PDGFC, PDGFD, TNC, POSTN, and LGALS9) in the CSF of CT2A-Luc tumor-bearing mice (mean ± s.d., n = 5 per group).

**b**, Schematic of the placement and implantation of osmotic pumps and injection cannulas in the CSF replacement experiment. Figure created with BioRender.com.

**c**, Tumor burden size in GL261-Luc tumor-bearing mice of the cCSF and gCSF groups (mean ± s.d., n = 7 per group).

**d**, Representative bioluminescence imaging images of GL261-Luc tumor-bearing mice in the cCSF and gCSF groups.

**e**, Representative flow cytometry images of CD45<sup>+</sup>CD8<sup>+</sup> cells, IFN- $\gamma$ <sup>+</sup> cells (gated on CD45<sup>+</sup>CD8<sup>+</sup>), and PD1<sup>+</sup> cells (gated on CD45<sup>+</sup>CD8<sup>+</sup>) in tumor tissues of CT2A-Luc tumor-bearing mice in the cCSF and gCSF groups.

**f**, Bar graphs showing the proportion of IFN- $\gamma^+$  cells (gated on CD45 $^+$ CD8 $^+$ ) in tumor tissues of CT2A-Luc tumor-bearing mice (mean  $\pm$  s.d., n = 5 per group).

**g**, Representative flow cytometry images of CD45 $^+$ CD8 $^+$  cells, IFN- $\gamma^+$  cells (gated on CD45 $^+$ CD8 $^+$ ), and PD1 $^+$  cells (gated on CD45 $^+$ CD8 $^+$ ) in tumor tissues of GL261-Luc tumor-bearing mice in the cCSF and gCSF groups.

**h**, Bar graphs showing the proportions of CD45 $^+$ CD8 $^+$  cells, IFN- $\gamma^+$  cells (gated on CD45 $^+$ CD8 $^+$ ), and PD1 $^+$  cells (gated on CD45 $^+$ CD8 $^+$ ) in tumor tissues of GL261-Luc tumor-bearing mice (mean  $\pm$  s.d., n = 5 per group).

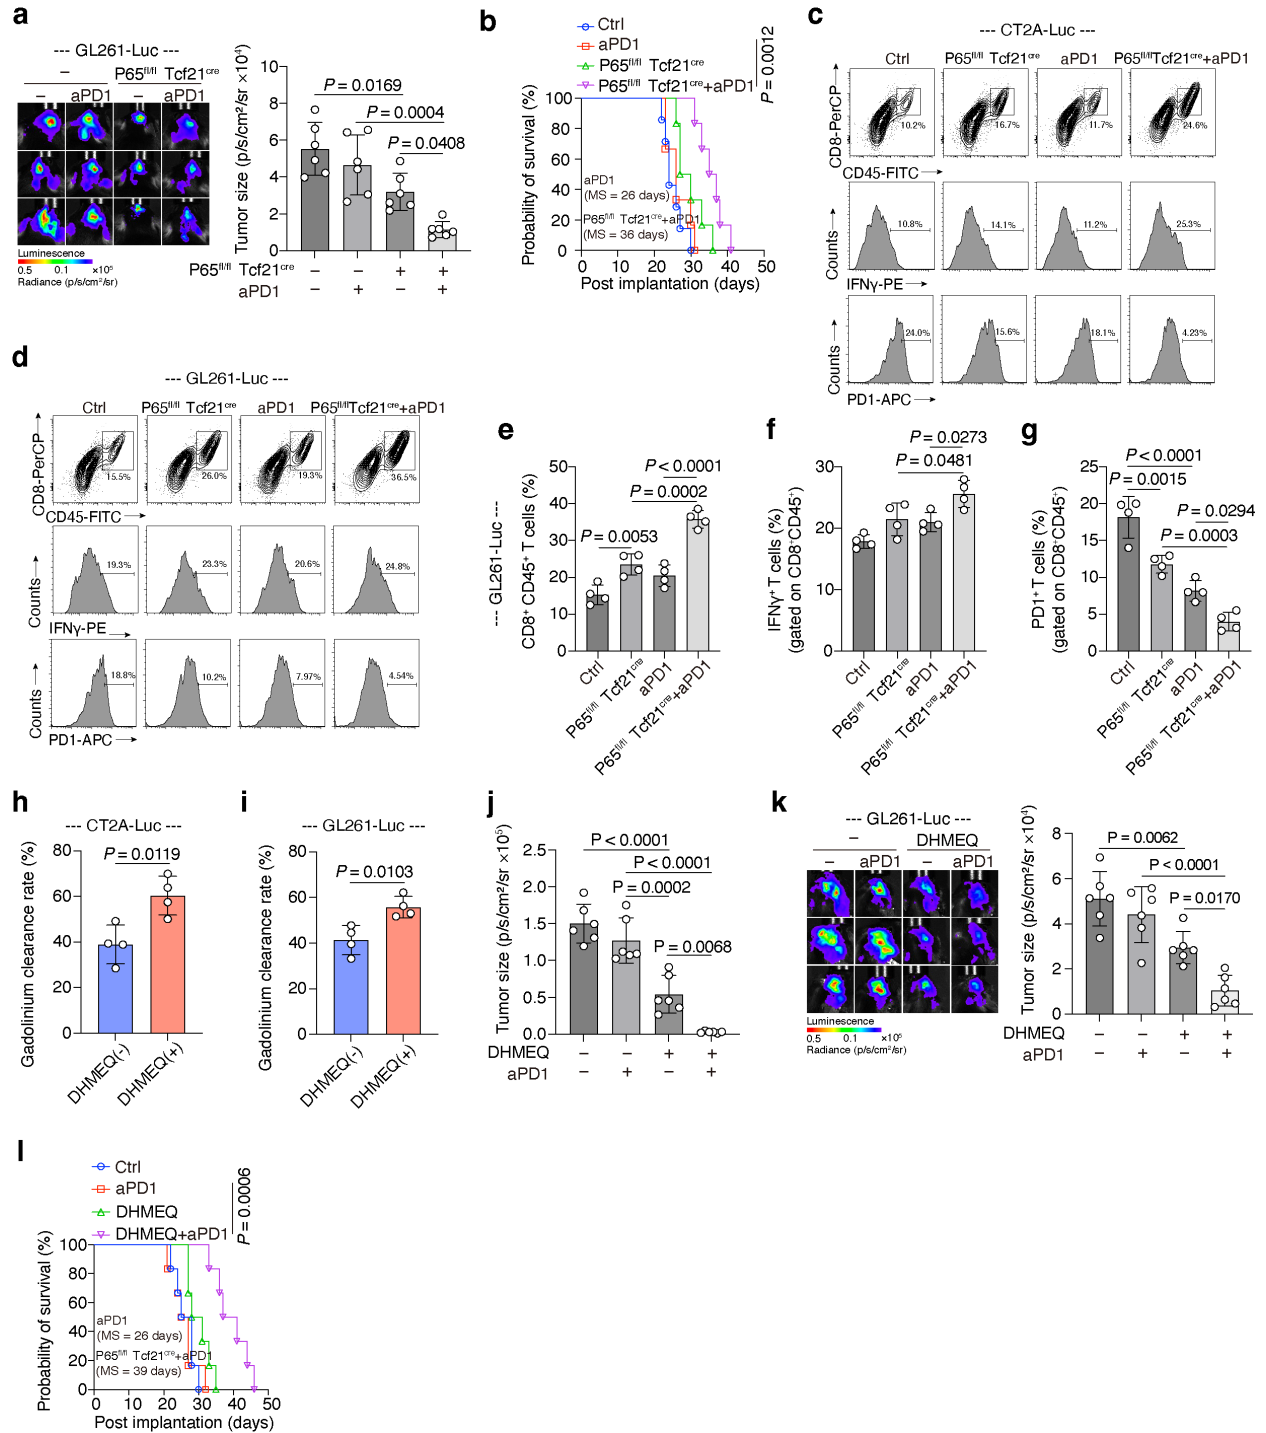

**Extended Data Fig. 6 | Combined P65 inhibition and anti-PD-1 therapy synergistically enhances GBM treatment via improved CSF clearance and CD8<sup>+</sup> T cell function.**

**a**, Left: Representative bioluminescence imaging images of GL261-Luc tumor-bearing mice in the Ctrl, aPD1, P65<sup>fl/fl</sup>Tcf<sup>Cre</sup>, and aPD1 + P65<sup>fl/fl</sup>Tcf<sup>Cre</sup> groups. Right: Bar graphs showing tumor burden in these mice (mean  $\pm$  s.d., n = 6 per group).



113 **b**, Survival curves of GL261-Luc tumor-bearing mice in the Ctrl, aPD1, P65<sup>f/f</sup>Tcf<sup>Cre</sup>, and aPD1 +  
114 P65<sup>f/f</sup>Tcf<sup>Cre</sup> groups. (n = 6 per group, Log-rank test).

115 **c–d**, Representative flow cytometry images of CD45<sup>+</sup>CD8<sup>+</sup> cells, IFN- $\gamma$ <sup>+</sup> cells (gated on  
116 CD45<sup>+</sup>CD8<sup>+</sup>), and PD1<sup>+</sup> cells (gated on CD45<sup>+</sup>CD8<sup>+</sup>) in tumor tissues of CT2A/GL261-Luc tumor-  
117 bearing mice in the control (Ctrl), anti-PD1 monotherapy (aPD1), P65<sup>f/f</sup>Tcf<sup>Cre</sup>, and aPD1 +  
118 P65<sup>f/f</sup>Tcf<sup>Cre</sup> groups.

119 **e–g**, Bar graphs showing the proportions of CD45<sup>+</sup>CD8<sup>+</sup>, IFN- $\gamma$ <sup>+</sup> cells (gated on CD45<sup>+</sup>CD8<sup>+</sup>), and  
120 PD1<sup>+</sup> cells (gated on CD45<sup>+</sup>CD8<sup>+</sup>) in tumor tissues of GL261-Luc tumor-bearing mice in the  
121 control (Ctrl), P65<sup>f/f</sup>Tcf<sup>Cre</sup>, anti-PD1 monotherapy (aPD1), and aPD1 + P65<sup>f/f</sup>Tcf<sup>Cre</sup> groups (mean  
122  $\pm$  s.d., n = 4 per group).

123 **h–i**, Bar graphs showing CSF clearance rate in CT2A-Luc and GL261-Luc tumor-bearing mice  
124 after DHMEQ treatment (mean  $\pm$  s.d., n = 4 per group).

125 **j**, Bar graphs showing tumor burden of CT2A-Luc tumor-bearing mice in the Ctrl, DHMEQ, aPD1,  
126 and aPD1 + DHMEQ groups. (mean  $\pm$  s.d., n = 6 per group).

127 **k**, Left: Representative bioluminescence imaging images of GL261-Luc tumor-bearing mice in the  
128 control (Ctrl), DHMEQ monotherapy, anti-PD1 monotherapy (aPD1), and aPD1 + DHMEQ  
129 groups. Right: Tumor burden in each group (mean  $\pm$  s.d., n = 6 per group).

130 **l**, Survival curves of GL261-Luc tumor-bearing mice in the control (Ctrl), DHMEQ monotherapy,  
131 anti-PD1 monotherapy (aPD1), and aPD1 + DHMEQ groups (n = 6 per group, Log-rank test).
